# Supplementary material for: Gene expression patterns induced at different stages of rhinovirus infection in human alveolar epithelial cells
Source: PLoS One. 2017 May 30;12(5):e0176947. doi: 10.1371/journal.pone.0176947 (PMC5448745; doi:10.1371/journal.pone.0176947)
Supplement: S1 Table — DE genes were generated by Transcriptome Analysis Console v2.0. p-values obtained from One-Way Between-Subject ANOVA (unpaired). (XLSX) [file pone.0176947.s004.xlsx]

## Sheet: 6hpi_1.5fold_gene list
Transcript Cluster ID	Transcript ID(Array Design)	v Bi-weight Avg Signal (log2)	n Bi-weight Avg Signal (log2)	Fold Change (linear) (v vs. n)	ANOVA p-value (v vs. n)	Gene Symbol	Description	TC Comment
11724828_at	Hs.75498.1	6.5	4.06	5.41	0.001083	CCL20	chemokine (C-C motif) ligand 20
11760574_x_at	Hs.283565.3	6.55	4.85	3.26	0.002594	FOSL1	FOS-like antigen 1
11724478_s_at	Hs.283565.1	6.59	4.92	3.18	0.002265	FOSL1	FOS-like antigen 1
11730096_a_at	Hs.227817.1	7.33	5.71	3.06	0.000202	BCL2A1	BCL2-related protein A1
11718841_s_at	Hs.624.1	6.41	4.81	3.04	0.009784	CXCL8	chemokine (C-X-C motif) ligand 8
11726611_x_at	Hs.517617.1	5.99	4.41	2.98	0.002774	MAFF	v-maf avian musculoaponeurotic fibrosarcoma oncogene homolog F
11719366_s_at	Hs.789.1	7.41	5.91	2.83	0.000696	CXCL1	chemokine (C-X-C motif) ligand 1 (melanoma growth stimulating activity, alpha)
11744618_a_at	Hs.298654.4	7.02	5.53	2.8	0.013587	DUSP6	dual specificity phosphatase 6
11717473_s_at	Hs.642938.1	5.82	4.46	2.58	0.001192	IGFBP1	insulin-like growth factor binding protein 1
11756155_a_at	Hs.201623.5	5.04	3.7	2.53	0.006386	NHS	Nance-Horan syndrome (congenital cataracts and dental anomalies)
11728233_a_at	Hs.439060.1	7.01	5.71	2.45	0.008374	CLDN1	claudin 1
11759682_at	Hs.480311.5	5.19	3.99	2.3	0.000941	PDLIM5	PDZ and LIM domain 5
11722049_a_at	Hs.298654.1	5.92	4.76	2.24	0.02944	DUSP6	dual specificity phosphatase 6
11725024_a_at	Hs.487046.1	7.34	6.19	2.23	0.001452	LOC100129518	uncharacterized LOC100129518; superoxide dismutase 2, mitochondrial
11723147_a_at	Hs.655301.1	8.44	7.3	2.21	0.000647	NAV3	neuron navigator 3
11716384_at	Hs.303649.1	6.65	5.52	2.2	0.015499	CCL2	chemokine (C-C motif) ligand 2
11752387_a_at	Hs.369438.3	4.16	3.09	2.1	0.049277	ETS1	v-ets avian erythroblastosis virus E26 oncogene homolog 1
11744435_a_at	Hs.298654.3	6.65	5.59	2.09	0.024889	DUSP6	dual specificity phosphatase 6
11728476_a_at	Hs.89690.1	4.81	3.78	2.05	0.015034	CXCL3	chemokine (C-X-C motif) ligand 3
11743783_a_at	Hs.533953.1	4.19	3.16	2.04	0.00661	KIAA1462	KIAA1462
11723103_x_at	Hs.173030.1	5.02	4.01	2.02	0.013386	GNB4	guanine nucleotide binding protein (G protein), beta polypeptide 4
11758043_s_at	Hs.493396.1	8.18	7.19	1.99	0.000907	IER2	immediate early response 2
11716848_a_at	Hs.153310.1	4.28	3.29	1.98	0.032989	PREX1	phosphatidylinositol-3,4,5-trisphosphate-dependent Rac exchange factor 1
11721175_at	Hs.131269.1	5.43	4.44	1.98	0.046188	RARRES1	retinoic acid receptor responder (tazarotene induced) 1
11736734_a_at	Hs.194392.1	3.38	2.39	1.98	0.043441	DPY19L3	dpy-19-like 3 (C. elegans)
11717638_at	Hs.632267.1	8.3	7.32	1.96	0.038565	SDC4	syndecan 4
11719433_at	Hs.197644.1	4.38	3.42	1.95	0.006835	HECA	headcase homolog (Drosophila)
11723703_s_at	Hs.19385.1	4.02	3.05	1.95	0.0002	ABHD5	abhydrolase domain containing 5
11728413_at	Hs.368077.1	5.1	4.13	1.95	0.03274	SERPINB8	serpin peptidase inhibitor, clade B (ovalbumin), member 8
11721733_a_at	Hs.86724.1	5.77	4.81	1.94	0.012249	GCH1	GTP cyclohydrolase 1
11730254_at	Hs.46523.1	4.72	3.77	1.93	0.021154	ELK3	ELK3, ETS-domain protein (SRF accessory protein 2)
11715306_s_at	g22035683	8.87	7.93	1.91	0.017872	AREG	amphiregulin
11746433_a_at	Hs.439060.2	6.75	5.84	1.89	0.008691	CLDN1	claudin 1
11763553_at	Hs.114322.1	3.54	2.63	1.89	0.033212
11730456_at	Hs.656757.1	4.25	3.34	1.88	0.001142	CCDC96	coiled-coil domain containing 96
11728761_a_at	Hs.149261.1	5.03	4.13	1.87	0.005586	LOC100506403	uncharacterized LOC100506403; uncharacterized LOC101928269; runt-related transcription factor 1
11730719_x_at	Hs.656471.1	4.71	3.81	1.87	0.009344	AP1S2	adaptor-related protein complex 1, sigma 2 subunit
11739806_a_at	Hs.715627.1	3.53	2.63	1.86	0.002893	RASAL2	RAS protein activator like 2
11743507_a_at	Hs.654668.2	5.4	4.5	1.86	0.001009	ARHGAP26	Rho GTPase activating protein 26
11748166_a_at	Hs.171596.2	5.84	4.94	1.86	0.005632	EPHA2	EPH receptor A2
11758967_s_at	Hs.438231.1	7.83	6.94	1.85	0.003491	TFPI2	tissue factor pathway inhibitor 2
11733924_a_at	Hs.437474.2	4.66	3.78	1.84	0.023051	RIOK1	RIO kinase 1
11762512_a_at	Hs.655310.2	3.54	2.66	1.84	0.006484	ERICH1	glutamate-rich 1; FLJ00290 protein
11723102_at	Hs.173030.1	4.77	3.9	1.83	0.013043	GNB4	guanine nucleotide binding protein (G protein), beta polypeptide 4
11728715_at	Hs.89714.1	9.56	8.69	1.83	0.000207	CXCL5	chemokine (C-X-C motif) ligand 5
11730540_a_at	Hs.153088.1	5.3	4.43	1.83	0.009776	TAF1A	TATA box binding protein (TBP)-associated factor, RNA polymerase I, A, 48kDa
11742818_a_at	Hs.466871.2	5.23	4.36	1.83	0.011296	PLAUR	plasminogen activator, urokinase receptor
11759341_at	Hs.1544.1	3.47	2.6	1.83	0.011161	RGR	retinal G protein coupled receptor
11761728_a_at	Hs.696086.3	4.9	4.04	1.81	0.031599	SMARCE1	SWI/SNF related, matrix associated, actin dependent regulator of chromatin, subfamily e, member 1
11723883_at	Hs.355455.1	7.29	6.44	1.8	0.004003	SOWAHC	sosondowah ankyrin repeat domain family member C
11726193_at	Hs.170388.1	6.48	5.64	1.8	0.01977	MARCH4	membrane-associated ring finger (C3HC4) 4, E3 ubiquitin protein ligase
11741507_a_at	Hs.433337.3	6.67	5.82	1.8	0.006596	SMOX	spermine oxidase
11741980_a_at	Hs.298654.2	6.75	5.9	1.8	0.014227	DUSP6	dual specificity phosphatase 6
11717025_s_at	Hs.387255.1	8.99	8.15	1.79	0.000815	CXCL5	chemokine (C-X-C motif) ligand 5; glyoxylate reductase 1 homolog (Arabidopsis)
11725015_x_at	Hs.61271.1	4.71	3.86	1.79	0.012113	MAP9	microtubule-associated protein 9
11743157_a_at	Hs.155729.1	3.14	2.3	1.79	0.028052	ETFDH	electron-transferring-flavoprotein dehydrogenase
11725517_x_at	Hs.124649.1	3.46	2.62	1.78	0.001393	ABCG1	ATP-binding cassette, sub-family G (WHITE), member 1
11759680_a_at	Hs.477126.2	4.07	3.24	1.78	0.040277	ATG3	autophagy related 3
11724479_x_at	Hs.283565.1	5.54	4.72	1.77	0.011213	FOSL1	FOS-like antigen 1
11745727_a_at	Hs.511504.4	3.79	2.97	1.77	0.014635	TCF12	transcription factor 12
11729190_a_at	Hs.285354.2	4.76	3.94	1.76	0.049163	MAX	MYC associated factor X
11749065_a_at	Hs.591366.2	3.06	2.25	1.76	0.012712	MCU	mitochondrial calcium uniporter
11754524_x_at	Hs.438231.3	9.54	8.72	1.76	0.001011	TFPI2	tissue factor pathway inhibitor 2
11758606_s_at	Hs.622498.1	4.48	3.67	1.76	0.01338	RSBN1	round spermatid basic protein 1
11719218_at	Hs.527973.1	5.35	4.54	1.75	0.003064	SOCS3	suppressor of cytokine signaling 3
11728716_x_at	Hs.89714.1	9.86	9.05	1.75	0.000257	CXCL5	chemokine (C-X-C motif) ligand 5
11753988_a_at	Hs.18676.2	5.23	4.42	1.75	0.007781	SPRY2	sprouty homolog 2 (Drosophila)
11755242_a_at	Hs.581632.5	3.89	3.09	1.75	0.024839	SKIL	SKI-like proto-oncogene
11718022_x_at	Hs.591602.1	7.44	6.64	1.74	0.003751	SSFA2	sperm specific antigen 2
11724038_a_at	Hs.196384.1	7.21	6.41	1.74	0.040095	PTGS2	prostaglandin-endoperoxide synthase 2 (prostaglandin G/H synthase and cyclooxygenase)
11739800_a_at	Hs.632066.1	5.55	4.75	1.73	0.018348	VCPIP1	valosin containing protein (p97)/p47 complex interacting protein 1
11717639_x_at	Hs.632267.1	8.36	7.57	1.72	0.048759	SDC4	syndecan 4
11719367_a_at	Hs.709337.1	5.24	4.45	1.72	0.034353	PLEKHO2	pleckstrin homology domain containing, family O member 2
11722487_x_at	Hs.512963.1	3.46	2.67	1.72	0.006727	ALG11	ALG11, alpha-1,2-mannosyltransferase; UTP14, U3 small nucleolar ribonucleoprotein, homolog C (yeast)
11724431_at	Hs.434247.1	5.39	4.6	1.72	0.015135	C3orf52	chromosome 3 open reading frame 52
11744005_at	Hs.154036.1	7.23	6.45	1.72	0.004674	PHLDA2	pleckstrin homology-like domain, family A, member 2
11759414_at	Hs.546256.1	5.72	4.94	1.72	0.04825	GCSH	glycine cleavage system protein H (aminomethyl carrier); glycine cleavage system H protein, mitochondrial-like
11719792_at	Hs.631733.1	5.58	4.8	1.71	0.017479	GPRC5A	G protein-coupled receptor, class C, group 5, member A
11719898_s_at	Hs.799.1	6.28	5.51	1.71	0.000969	HBEGF	heparin-binding EGF-like growth factor
11724275_s_at	Hs.716411.1	7.07	6.3	1.71	0.000489	TMEM158	transmembrane protein 158 (gene/pseudogene)
11725386_a_at	Hs.591761.1	5.96	5.18	1.71	0.002248	HOMER1	homer homolog 1 (Drosophila)
11736783_s_at	Hs.696035.2	4.9	4.13	1.71	0.001288	RAB11FIP1	RAB11 family interacting protein 1 (class I)
11723884_at	Hs.355455.1	7.4	6.64	1.7	0.001198	SOWAHC	sosondowah ankyrin repeat domain family member C
11725584_at	Hs.592069.1	5.89	5.13	1.7	0.027174	HAS3	hyaluronan synthase 3
11740247_s_at	Hs.602571.2	3.91	3.15	1.7	0.000632	EXOSC3	exosome component 3
11722080_s_at	Hs.72071.1	3.41	2.65	1.69	0.036458	KCTD9	potassium channel tetramerization domain containing 9
11739318_a_at	Hs.476517.1	3.28	2.52	1.69	0.021221	FAM114A1	family with sequence similarity 114, member A1
11743496_a_at	Hs.521926.1	4.31	3.55	1.69	0.007365	MIR6845	microRNA 6845; nuclear receptor binding protein 2
11746634_a_at	Hs.444028.2	4.63	3.87	1.69	0.016981	CKAP2	cytoskeleton associated protein 2
11732073_x_at	Hs.373801.1	4.75	4	1.68	0.032482	ARL6	ADP-ribosylation factor-like 6
11744031_at	Hs.2256.1	7.5	6.76	1.68	0.000358	MMP7	matrix metallopeptidase 7 (matrilysin, uterine)
11723540_a_at	Hs.448664.1	3.42	2.68	1.67	0.024936	TMEM80	transmembrane protein 80
11734992_a_at	Hs.416089.2	3.2	2.46	1.67	0.031372	ARFIP1	ADP-ribosylation factor interacting protein 1
11744030_a_at	Hs.2256.1	8.62	7.88	1.67	0.00126	MMP7	matrix metallopeptidase 7 (matrilysin, uterine)
11746128_x_at	Hs.444441.2	4.9	4.16	1.67	0.038056	CLPTM1	cleft lip and palate associated transmembrane protein 1
11728710_a_at	Hs.513470.1	3.91	3.18	1.66	0.023863	NFATC2IP	nuclear factor of activated T-cells, cytoplasmic, calcineurin-dependent 2 interacting protein
11753719_a_at	Hs.151413.2	4.69	3.96	1.66	0.037913	GMFB	glia maturation factor, beta
11724196_s_at	Hs.25590.1	6.3	5.58	1.65	0.030142	STC1	stanniocalcin 1
11727690_at	Hs.467304.1	4.18	3.45	1.65	0.012595	IL11	interleukin 11
11740925_a_at	Hs.338182.1	3.48	2.76	1.65	0.031015	FAM151B	family with sequence similarity 151, member B
11743062_a_at	Hs.466871.3	5.99	5.27	1.65	0.001913	PLAUR	plasminogen activator, urokinase receptor
11744292_at	Hs.159223.1	4.4	3.68	1.65	0.011569	NAB2	NGFI-A binding protein 2 (EGR1 binding protein 2)
11754344_s_at	Hs.323308.3	4.06	3.34	1.65	0.002264	SPRY4	sprouty homolog 4 (Drosophila)
11729781_at	Hs.378813.1	4.42	3.71	1.64	0.016775	FAM127C	family with sequence similarity 127, member C
11763860_s_at	Hs.101014.5	3.1	2.39	1.64	0.001646
11717619_at	Hs.171596.1	7.84	7.13	1.63	0.008415	EPHA2	EPH receptor A2
11739636_s_at	Hs.416108.1	5.34	4.64	1.63	0.01818	CDK12	cyclin-dependent kinase 12
11743617_at	Hs.482077.1	7.05	6.35	1.63	0.003458	ITGA2	integrin, alpha 2 (CD49B, alpha 2 subunit of VLA-2 receptor)
11721989_a_at	Hs.591307.1	4.95	4.25	1.62	0.001113	FAM131A	family with sequence similarity 131, member A
11724448_a_at	Hs.500771.1	7.28	6.58	1.62	0.021872	DNMBP	dynamin binding protein
11724907_a_at	Hs.130491.1	3.73	3.04	1.62	0.020797	MAP4K5	mitogen-activated protein kinase kinase kinase kinase 5
11749756_x_at	Hs.522545.3	4.12	3.43	1.62	0.010428	ZNF791	zinc finger protein 791
11717565_s_at	Hs.707901.1	7.02	6.33	1.61	0.001419	EMP1	epithelial membrane protein 1
11725014_at	Hs.61271.1	4.34	3.65	1.61	0.001746	MAP9	microtubule-associated protein 9
11726338_a_at	Hs.89499.1	3.54	2.85	1.61	0.043349	ALOX5	arachidonate 5-lipoxygenase
11747927_a_at	Hs.136348.4	2.71	2.02	1.61	0.027543	POSTN	periostin, osteoblast specific factor
11757991_s_at	Hs.597999.1	5.47	4.78	1.61	0.032927	ANKRD12	ankyrin repeat domain 12
11743063_x_at	Hs.466871.3	6.15	5.48	1.6	0.014293	PLAUR	plasminogen activator, urokinase receptor
11723817_at	Hs.483238.1	4.52	3.85	1.59	0.018464	ARHGAP29	Rho GTPase activating protein 29
11732719_at	Hs.115263.1	10.23	9.56	1.59	0.005799	EREG	epiregulin
11733248_a_at	Hs.655055.2	6.43	5.76	1.59	0.027043	DBNDD2	dysbindin (dystrobrevin binding protein 1) domain containing 2; Sys1 golgi trafficking protein; SYS1-DBNDD2 readthrough (NMD candidate)
11738053_x_at	Hs.466871.1	6.91	6.25	1.59	0.003874	PLAUR	plasminogen activator, urokinase receptor
11758028_s_at	Hs.644954.1	5.15	4.49	1.59	0.006637	FOXQ1	forkhead box Q1
11722240_a_at	Hs.642842.1	5.77	5.1	1.58	0.003013	SAV1	salvador family WW domain containing protein 1
11746008_x_at	Hs.612385.2	3.67	3.01	1.58	0.009041	NEXN	nexilin (F actin binding protein)
11749172_x_at	Hs.612385.3	3.49	2.83	1.58	0.007462	NEXN	nexilin (F actin binding protein)
11753764_s_at	Hs.443577.3	8.02	7.36	1.58	0.011415	TNFRSF21	tumor necrosis factor receptor superfamily, member 21
11718939_s_at	Hs.211600.1	6.1	5.45	1.57	0.040759	TNFAIP3	tumor necrosis factor, alpha-induced protein 3
11722231_at	Hs.22265.1	6.28	5.63	1.57	0.019321	PDP1	pyruvate dehyrogenase phosphatase catalytic subunit 1
11724987_a_at	Hs.11614.1	3	2.35	1.57	0.017441	CCDC113	coiled-coil domain containing 113
11729517_a_at	Hs.173001.2	4.48	3.83	1.57	0.032311	ZNF644	zinc finger protein 644
11739809_at	Hs.374147.1	6.73	6.08	1.57	0.035048	TMEM156	transmembrane protein 156
11744559_a_at	Hs.716436.2	7.49	6.84	1.57	0.024129	SLC25A37	solute carrier family 25 (mitochondrial iron transporter), member 37
11751308_a_at	Hs.519904.5	6.08	5.43	1.57	0.003029	RBM24	RNA binding motif protein 24
11753350_x_at	Hs.645517.3	7.98	7.34	1.57	0.016232	KRR1	KRR1, small subunit (SSU) processome component, homolog (yeast)
11753794_a_at	Hs.200253.2	3.86	3.21	1.57	0.024222	NCMAP	noncompact myelin associated protein
11763396_x_at	Hs.189641.4	2.94	2.29	1.57	0.028491	SEC24D	SEC24 family member D
11717312_at	Hs.494738.1	4.04	3.4	1.56	0.023441	IKBKAP	inhibitor of kappa light polypeptide gene enhancer in B-cells, kinase complex-associated protein
11723297_a_at	Hs.591908.1	5.92	5.27	1.56	0.011919	AKAP2	A kinase (PRKA) anchor protein 2; PALM2-AKAP2 readthrough
11725689_a_at	Hs.466435.1	4.92	4.29	1.56	0.044954	RHPN2	rhophilin, Rho GTPase binding protein 2
11743444_s_at	Hs.502876.1	5.81	5.17	1.56	0.03858	RHOB	ras homolog family member B
11744128_x_at	Hs.75765.1	7.14	6.51	1.56	0.041611	CXCL2	chemokine (C-X-C motif) ligand 2
11747996_a_at	Hs.434059.3	5.85	5.22	1.56	0.046688	ETV4	ets variant 4
11755472_x_at	Hs.477700.3	4.69	4.05	1.56	0.001172	DBR1	debranching RNA lariats 1
11757022_x_at	Hs.438231.11	10.16	9.52	1.56	0.000961	TFPI2	tissue factor pathway inhibitor 2
11721291_a_at	Hs.62192.1	4.97	4.33	1.55	0.0096	F3	coagulation factor III (thromboplastin, tissue factor)
11727654_at	Hs.112577.1	2.66	2.03	1.55	0.039953	SRRM4	serine/arginine repetitive matrix 4
11727814_at	Hs.444075.1	6.65	6.02	1.55	0.000527	UBASH3B	ubiquitin associated and SH3 domain containing B
11745569_s_at	Hs.646006.1	5.72	5.08	1.55	0.048904	LOC100996732	uncharacterized LOC100996732; uncharacterized LOC100996735; lymphocyte-specific protein 1 pseudogene; lymphocyte-specific protein 1; lymphocyte-specific protein 1 pseudogene 3
11759618_a_at	Hs.716436.2	6.21	5.58	1.55	0.002357	SLC25A37	solute carrier family 25 (mitochondrial iron transporter), member 37
11719588_a_at	Hs.524760.1	6.69	6.07	1.54	0.016903	OAS1	2'-5'-oligoadenylate synthetase 1, 40/46kDa
11723819_at	Hs.709364.1	3.26	2.63	1.54	0.016336	PM20D2	peptidase M20 domain containing 2
11724036_a_at	Hs.196384.1	5.71	5.09	1.54	0.000716	PTGS2	prostaglandin-endoperoxide synthase 2 (prostaglandin G/H synthase and cyclooxygenase)
11729263_x_at	Hs.104879.1	6.79	6.17	1.54	0.017418	SERPINB9	serpin peptidase inhibitor, clade B (ovalbumin), member 9
11730180_s_at	Hs.74050.1	5.53	4.9	1.54	0.035109	KDSR	3-ketodihydrosphingosine reductase
11734345_a_at	Hs.709483.2	2.83	2.2	1.54	0.014529	TRIM10	tripartite motif containing 10
11743618_at	Hs.482077.1	5.53	4.91	1.54	0.032671	ITGA2	integrin, alpha 2 (CD49B, alpha 2 subunit of VLA-2 receptor)
11746517_a_at	Hs.668378.3	4.16	3.54	1.54	0.010694	ZNF484	zinc finger protein 484
11755110_a_at	Hs.518055.5	5.53	4.91	1.54	0.01689	LRIG1	leucine-rich repeats and immunoglobulin-like domains 1
11756074_a_at	Hs.2256.3	7.78	7.16	1.54	0.001922	MMP7	matrix metallopeptidase 7 (matrilysin, uterine)
11715487_a_at	Hs.719112.1	7.28	6.66	1.53	0.005967	MCL1	myeloid cell leukemia 1
11723309_at	Hs.213467.1	3.53	2.91	1.53	0.03593	TNFRSF10D	tumor necrosis factor receptor superfamily, member 10d, decoy with truncated death domain
11728828_at	Hs.154299.1	9.56	8.95	1.53	0.001031	F2RL1	coagulation factor II (thrombin) receptor-like 1
11728872_a_at	Hs.519904.1	3.32	2.7	1.53	0.006132	RBM24	RNA binding motif protein 24
11729203_a_at	Hs.301685.1	5.84	5.23	1.53	0.008257	PLXND1	plexin D1
11735242_s_at	Hs.376289.1	7.01	6.4	1.53	0.001494	ZC3H12C	zinc finger CCCH-type containing 12C
11740410_a_at	Hs.589884.3	6.08	5.47	1.53	0.030071	RNF24	ring finger protein 24
11740446_a_at	Hs.191510.3	3.11	2.49	1.53	0.02422	BTN3A1	butyrophilin, subfamily 3, member A1
11749610_a_at	Hs.34341.3	6.39	5.78	1.53	0.025508	CD58	CD58 molecule
11752386_a_at	Hs.570078.4	6.17	5.55	1.53	0.000393	NAB1	NGFI-A binding protein 1 (EGR1 binding protein 1)
11753059_x_at	Hs.193226.5	4.52	3.9	1.53	0.00647	UGGT2	UDP-glucose glycoprotein glucosyltransferase 2
11753347_a_at	Hs.471619.5	3.37	2.76	1.53	0.005889	NMUR1	neuromedin U receptor 1
11756856_a_at	Hs.480101.6	3.9	3.29	1.53	0.049834	HELQ	helicase, POLQ-like
11760314_at	Hs.406557.3	2.75	2.14	1.53	0.04379	AK309215	Homo sapiens cDNA FLJ50506 complete cds.; CDC-like kinase 4
11721604_a_at	Hs.655519.1	3.38	2.78	1.52	0.00865	SYNPO2	synaptopodin 2
11722523_a_at	Hs.656313.1	3.99	3.39	1.52	0.049349	TMCO4	transmembrane and coiled-coil domains 4
11727927_a_at	Hs.370666.1	2.65	2.04	1.52	0.002826	FOXO1	forkhead box O1
11728172_a_at	Hs.632401.2	3.15	2.55	1.52	0.017866	MOB3C	MOB kinase activator 3C
11733616_at	Hs.42151.2	2.59	1.99	1.52	0.041501	HNMT	histamine N-methyltransferase
11755990_a_at	Hs.712632.3	5.05	4.44	1.52	0.000632	CAPN12	calpain 12
11759560_s_at	Hs.596025.1	7.17	6.57	1.52	0.049923	SLC25A37	solute carrier family 25 (mitochondrial iron transporter), member 37
11763822_at	Hs.115263.2	5.92	5.31	1.52	0.021617	EREG	epiregulin
11717256_at	Hs.81170.1	6.72	6.13	1.51	0.023178	PIM1	Pim-1 proto-oncogene, serine/threonine kinase
11722276_at	Hs.475208.1	5.89	5.29	1.51	0.027327	ZBED4	zinc finger, BED-type containing 4
11723821_a_at	Hs.705442.1	9.18	8.59	1.51	0.015561	SMURF2	SMAD specific E3 ubiquitin protein ligase 2
11739516_at	Hs.654388.1	5.94	5.35	1.51	0.0155	CA8	carbonic anhydrase VIII
11741304_a_at	Hs.453951.4	6.32	5.73	1.51	0.00794	NRG1	neuregulin 1
11744162_a_at	Hs.417962.2	9.45	8.85	1.51	0.003806	DUSP4	dual specificity phosphatase 4
11744184_a_at	Hs.715656.1	7.81	7.22	1.51	0.001371	SIPA1L2	signal-induced proliferation-associated 1 like 2
11745129_x_at	Hs.656047.2	2.83	2.24	1.51	0.027967	CCRN4L	CCR4 carbon catabolite repression 4-like (S. cerevisiae)
11747726_s_at	Hs.508958.2	3.41	2.82	1.51	0.04649	STXBP6	syntaxin binding protein 6 (amisyn)
11748810_a_at	Hs.208358.2	7.14	6.54	1.51	0.010211	EVA1C	eva-1 homolog C (C. elegans)
11755219_a_at	Hs.2030.3	6.15	5.56	1.51	0.001506	THBD	thrombomodulin
11757144_at	Hs.689709.1	3.58	2.98	1.51	0.038038	SNORA13	small nucleolar RNA, H/ACA box 13
11763169_at	Hs.220971.2	6.43	5.84	1.51	0.042599	FOSL2	FOS-like antigen 2
11719532_x_at	Hs.591033.1	3.68	4.28	-1.51	0.002498	MMP19	matrix metallopeptidase 19
11720661_at	Hs.150423.1	3.3	3.9	-1.51	0.027106	CDK9	cyclin-dependent kinase 9
11723393_a_at	Hs.459183.1	2.94	3.54	-1.51	0.000806	ALPK3	alpha-kinase 3
11724434_a_at	Hs.660232.1	1.65	2.24	-1.51	0.027682	TPK1	thiamin pyrophosphokinase 1
11734934_a_at	Hs.509664.1	3.05	3.64	-1.51	0.049281	FGD2	FYVE, RhoGEF and PH domain containing 2
11736230_a_at	Hs.699247.1	4.32	4.91	-1.51	0.031046	CRIM1	cysteine rich transmembrane BMP regulator 1 (chordin-like); uncharacterized LOC101929500
11737339_at	Hs.413931.1	2.52	3.11	-1.51	0.035933	ABCG8	ATP-binding cassette, sub-family G (WHITE), member 8
11742588_at	Hs.524483.1	2.38	2.97	-1.51	0.041152	OR6C2	olfactory receptor, family 6, subfamily C, member 2
11744927_x_at	Hs.546482.2	2.26	2.86	-1.51	0.037941	SLC9B2	solute carrier family 9, subfamily B (NHA2, cation proton antiporter 2), member 2
11750878_a_at	Hs.29742.3	3.44	4.04	-1.51	0.04856	ISM2	isthmin 2
11751341_s_at	Hs.454859.2	2.82	3.41	-1.51	0.012543	LOC645354	PRAME family member 1 pseudogene; PRAME family member 1; PRAME family member 14; PRAME family member 2
11753098_a_at	Hs.388827.5	2	2.59	-1.51	0.038649	RFX4	regulatory factor X, 4 (influences HLA class II expression)
11756908_a_at	Hs.222282.7	5.12	5.72	-1.51	0.01257	CCDC132	coiled-coil domain containing 132
11762888_x_at	Hs.525597.1	3.76	4.36	-1.51	0.042073	DIO3OS	DIO3 opposite strand/antisense RNA (head to head); microRNA 1247
11763602_a_at	Hs.106005.6	3.4	3.99	-1.51	0.001841	ZNF839	zinc finger protein 839
11721187_a_at	Hs.54697.1	4.43	5.04	-1.52	0.041242	ARHGEF9	Cdc42 guanine nucleotide exchange factor (GEF) 9
11721445_x_at	Hs.118681.1	3.16	3.76	-1.52	0.002539	ERBB3	v-erb-b2 avian erythroblastic leukemia viral oncogene homolog 3
11726576_x_at	Hs.250615.1	3.14	3.75	-1.52	0.044917	CYP2A6	cytochrome P450, family 2, subfamily A, polypeptide 6; cytochrome P450, family 2, subfamily A, polypeptide 7
11729498_at	Hs.283093.1	2.55	3.16	-1.52	0.015041	NMUR2	neuromedin U receptor 2
11732061_at	Hs.659349.1	3.28	3.88	-1.52	0.0091	RPA4	replication protein A4, 30kDa
11732828_at	Hs.151291.1	2.64	3.24	-1.52	0.010894	BSND	barttin CLCNK-type chloride channel accessory beta subunit
11739375_at	Hs.502730.1	2.56	3.16	-1.52	0.008073	SYT7	synaptotagmin VII
11740684_at	Hs.669645.1	2.44	3.05	-1.52	0.022868	HEPHL1	hephaestin-like 1
11741950_at	Hs.248131.1	3.17	3.77	-1.52	0.014534	GRM6	glutamate receptor, metabotropic 6
11747531_a_at	Hs.163543.2	3.5	4.1	-1.52	0.034989	AIFM3	apoptosis-inducing factor, mitochondrion-associated, 3
11750798_a_at	Hs.195667.2	3.46	4.06	-1.52	0.019393	TECPR2	tectonin beta-propeller repeat containing 2
11760838_at	Hs.371078.2	2.02	2.62	-1.52	0.038028	FAM179B	family with sequence similarity 179, member B
11761975_x_at	Hs.278704.1	2.95	3.56	-1.52	0.042707	LINC00114	long intergenic non-protein coding RNA 114
11724576_at	Hs.398196.1	2.59	3.2	-1.53	0.044987	MYCBPAP	MYCBP associated protein
11724996_at	Hs.22920.1	2.47	3.08	-1.53	0.004609	LAMP5	lysosomal-associated membrane protein family, member 5
11728942_s_at	Hs.36794.2	2.32	2.94	-1.53	0.030548	CCNDBP1	cyclin D-type binding-protein 1
11730314_a_at	Hs.439437.1	3.4	4.02	-1.53	0.017078	ERMAP	erythroblast membrane-associated protein (Scianna blood group)
11735294_a_at	Hs.187636.1	4.62	5.23	-1.53	0.01226	LRRK2	leucine-rich repeat kinase 2
11742109_a_at	Hs.437696.2	2.48	3.09	-1.53	0.02335	FBLN7	fibulin 7
11742434_a_at	Hs.26135.1	2.58	3.2	-1.53	0.017407	LRRC16B	leucine rich repeat containing 16B
11746108_a_at	Hs.514208.2	3.53	4.14	-1.53	0.010726	MPP2	membrane protein, palmitoylated 2 (MAGUK p55 subfamily member 2)
11751366_a_at	Hs.499620.2	2.86	3.48	-1.53	0.017244	GEMIN4	gem (nuclear organelle) associated protein 4
11754485_x_at	Hs.656672.3	2.18	2.79	-1.53	0.00966	SERHL	serine hydrolase-like
11756866_a_at	Hs.350588.3	2.47	3.08	-1.53	0.018585	GPR78	G protein-coupled receptor 78
11759159_at	Hs.658821.1	1.88	2.49	-1.53	0.025791	ABCB5	ATP-binding cassette, sub-family B (MDR/TAP), member 5
11761730_a_at	Hs.423756.5	4.09	4.7	-1.53	0.018108	SIRT6	sirtuin 6
11762525_s_at	HsAffx.115.1	9.8	10.42	-1.53	0.042211
11723375_a_at	Hs.21509.1	2.22	2.84	-1.54	0.026582	GLI3	GLI family zinc finger 3
11723876_at	Hs.444448.1	3.82	4.44	-1.54	0.013528	KCNK5	potassium channel, subfamily K, member 5
11726126_a_at	Hs.511951.1	2.38	3.01	-1.54	0.036427	ABCB9	ATP-binding cassette, sub-family B (MDR/TAP), member 9
11727957_a_at	Hs.112667.1	3.17	3.79	-1.54	0.032443	DNAI1	dynein, axonemal, intermediate chain 1
11733659_a_at	Hs.489254.1	2.42	3.04	-1.54	5.8e-05	TRIM69	tripartite motif containing 69
11738640_a_at	Hs.652347.1	3.75	4.37	-1.54	0.021765	EFCAB12	EF-hand calcium binding domain 12
11746718_at	Hs.709425.2	3.17	3.79	-1.54	0.049029	KDM4C	lysine (K)-specific demethylase 4C
11754734_a_at	Hs.580464.4	1.59	2.22	-1.54	0.027169	ATP6V1C2	ATPase, H+ transporting, lysosomal 42kDa, V1 subunit C2
11756106_a_at	Hs.435458.3	2.68	3.3	-1.54	0.025806	SETBP1	SET binding protein 1
11728546_a_at	Hs.654635.1	2.82	3.46	-1.55	0.045543	BTBD9	BTB (POZ) domain containing 9
11729459_x_at	Hs.591473.1	2.22	2.85	-1.55	0.013974	BNIPL	BCL2/adenovirus E1B 19kD interacting protein like; chromosome 1 open reading frame 56
11730839_at	Hs.591313.1	3.65	4.28	-1.55	0.002039	NUDT16	nudix (nucleoside diphosphate linked moiety X)-type motif 16
11733330_at	Hs.660044.1	2.46	3.09	-1.55	0.000261	CCDC170	coiled-coil domain containing 170
11733683_a_at	Hs.128075.1	2.07	2.7	-1.55	0.002352	FAM221B	family with sequence similarity 221, member B
11738154_at	Hs.54647.1	3.52	4.15	-1.55	0.037886	ZNF843	zinc finger protein 843
11738189_x_at	Hs.697294.2	3.83	4.47	-1.55	0.038388	TP73	tumor protein p73
11753620_s_at	HsAffx.1845.4	2.24	2.87	-1.55	0.014187	TAC3	tachykinin 3
11725370_s_at	Hs.73793.1	3.99	4.63	-1.56	0.022946	VEGFA	vascular endothelial growth factor A
11732518_at	Hs.673850.1	2.5	3.15	-1.56	0.004295	GPR52	G protein-coupled receptor 52
11735989_s_at	Hs.643431.1	3.25	3.89	-1.56	0.007093	IGJ	immunoglobulin J polypeptide, linker protein for immunoglobulin alpha and mu polypeptides
11749833_s_at	Hs.19383.2	2.14	2.78	-1.56	0.03374	AGT	angiotensinogen (serpin peptidase inhibitor, clade A, member 8)
11750688_a_at	Hs.4892.2	2.62	3.26	-1.56	0.019309	EFR3B	EFR3 homolog B (S. cerevisiae)
11760531_at	Hs.92236.2	1.99	2.63	-1.56	0.043055	KMT2B	lysine (K)-specific methyltransferase 2B
11761970_at	Hs.471096.3	2.07	2.72	-1.56	0.018479	ALS2	amyotrophic lateral sclerosis 2 (juvenile)
11764174_at	Hs.100161.1	2.5	3.14	-1.56	0.012445
11716913_a_at	Hs.7946.1	8.53	9.18	-1.57	0.000592	MTUS1	microtubule associated tumor suppressor 1
11726930_x_at	Hs.13768.1	2.24	2.89	-1.57	0.040403	CACNA2D4	calcium channel, voltage-dependent, alpha 2/delta subunit 4
11742311_at	Hs.274469.1	3.75	4.41	-1.57	0.029857	DUX1	double homeobox 1
11742616_at	Hs.554526.1	2.23	2.88	-1.57	0.002115	OR5W2	olfactory receptor, family 5, subfamily W, member 2
11751137_x_at	Hs.631576.5	4.11	4.76	-1.57	0.013639	DPF1	D4, zinc and double PHD fingers family 1
11760694_at	Hs.434247.2	2.84	3.49	-1.57	0.017693	C3orf52	chromosome 3 open reading frame 52
11760771_a_at	Hs.368587.2	2.24	2.89	-1.57	0.000319	PRLR	prolactin receptor
11761153_s_at	Hs.417077.2	2.63	3.28	-1.57	0.013962	CYP51A1-AS1	CYP51A1 antisense RNA 1 (head to head)
11761679_at	Hs.557097.2	3.38	4.03	-1.57	0.03257	PBX1	pre-B-cell leukemia homeobox 1
11735838_a_at	Hs.102598.1	2.9	3.56	-1.58	0.002663	MADCAM1	mucosal vascular addressin cell adhesion molecule 1
11738230_at	Hs.364260.1	2.61	3.27	-1.58	0.006114	FOXR2	forkhead box R2
11740772_a_at	Hs.96952.1	2.52	3.18	-1.58	0.03778	LIN54	lin-54 homolog (C. elegans)
11742327_x_at	Hs.767.2	3.65	4.3	-1.58	0.007316	GHRHR	growth hormone releasing hormone receptor
11748446_a_at	Hs.129959.9	3.78	4.45	-1.58	0.047542	IL17RC	interleukin 17 receptor C
11756495_a_at	Hs.655170.6	2.02	2.68	-1.58	0.037797	SPAG6	sperm associated antigen 6
11760002_at	Hs.248290.3	2.65	3.31	-1.58	0.035874	RNF212	ring finger protein 212
11720536_at	Hs.12106.1	3.93	4.6	-1.59	0.038223	MMAB	methylmalonic aciduria (cobalamin deficiency) cblB type
11729394_a_at	Hs.596096.1	2.56	3.23	-1.59	0.001207	HECTD2	HECT domain containing E3 ubiquitin protein ligase 2
11731343_s_at	Hs.460974.1	2.48	3.14	-1.59	0.001059	MAGEA9	melanoma antigen family A, 9; melanoma antigen family A, 9B
11734234_at	Hs.51011.1	2.11	2.78	-1.59	0.037795	HIST1H2AG	histone cluster 1, H2ag; histone cluster 1, H2ah; histone cluster 1, H2ai; histone cluster 1, H2ak; histone cluster 1, H2al; histone cluster 1, H2am
11747267_x_at	Hs.182421.2	2.09	2.76	-1.59	0.018869	TNNC2	troponin C type 2 (fast)
11759628_at	Hs.128067.2	3.02	3.7	-1.59	0.015887	WIPF1	WAS/WASL interacting protein family, member 1
11760906_x_at	Hs.631654.3	2.59	3.27	-1.59	0.009143	GPR162	G protein-coupled receptor 162
11761812_at	Hs.647083.3	3.19	3.86	-1.59	0.001909	WDR86	WD repeat domain 86
11728917_at	Hs.197116.1	2.51	3.19	-1.6	0.031288	SLC7A4	solute carrier family 7, member 4
11731364_a_at	Hs.437141.1	2.37	3.05	-1.6	0.012704	CCDC63	coiled-coil domain containing 63
11734447_x_at	Hs.158297.1	3.42	4.1	-1.6	0.008679	PDCD1	programmed cell death 1
11734473_a_at	Hs.307999.1	3.37	4.05	-1.6	0.013375	EXD1	exonuclease 3'-5' domain containing 1
11737865_a_at	Hs.112873.2	2.33	3.01	-1.6	0.022481	IGSF11	immunoglobulin superfamily, member 11
11738581_at	Hs.504211.1	2.44	3.11	-1.6	0.007021	OR8D1	olfactory receptor, family 8, subfamily D, member 1
11739657_a_at	Hs.376208.2	3.64	4.32	-1.6	0.035312	LTB	lymphotoxin beta (TNF superfamily, member 3)
11751648_a_at	Hs.719305.3	3.37	4.05	-1.6	0.027651	HGS	hepatocyte growth factor-regulated tyrosine kinase substrate
11751702_a_at	Hs.478125.5	3.18	3.87	-1.6	0.021349	INADL	InaD-like (Drosophila)
11762400_s_at	Hs.438587.6	4.33	5.01	-1.6	0.045859	PPIL2	peptidylprolyl isomerase (cyclophilin)-like 2
11715702_at	Hs.505654.1	2.52	3.2	-1.61	0.008436	ITGA5	integrin, alpha 5 (fibronectin receptor, alpha polypeptide)
11722718_a_at	Hs.128316.1	2.84	3.52	-1.61	0.004221	BAIAP2	BAI1-associated protein 2
11735382_at	Hs.513706.2	2	2.68	-1.61	0.029062	MARVELD3	MARVEL domain containing 3
11739848_at	Hs.449738.2	2.41	3.09	-1.61	0.020746	SLCO1B1	solute carrier organic anion transporter family, member 1B1
11740136_a_at	Hs.389457.1	2.02	2.71	-1.61	0.035534	T	T, brachyury homolog (mouse)
11747152_a_at	Hs.477114.6	1.88	2.56	-1.61	0.034022	PHLDB2	pleckstrin homology-like domain, family B, member 2
11748531_x_at	Hs.62003.3	2.8	3.49	-1.61	0.028115	CACFD1	calcium channel flower domain containing 1
11755822_a_at	Hs.183671.2	2.53	3.21	-1.61	0.034571	TDO2	tryptophan 2,3-dioxygenase
11763035_at	Hs.687024.1	2.39	3.08	-1.61	0.022242	TNAP	TRAFs and NIK-associated protein
11732883_a_at	Hs.36989.1	2.22	2.91	-1.62	0.036005	F7	coagulation factor VII (serum prothrombin conversion accelerator)
11740464_a_at	Hs.567423.2	3.14	3.83	-1.62	0.031154	PLCH1	phospholipase C, eta 1
11748159_a_at	Hs.504062.6	3.66	4.35	-1.62	0.012027	MIR6716	microRNA 6716; pleckstrin homology-like domain, family B, member 1
11751304_a_at	Hs.174103.4	2.64	3.34	-1.62	0.017661	ITGAL	integrin, alpha L (antigen CD11A (p180), lymphocyte function-associated antigen 1; alpha polypeptide)
11757131_at	Hs.689080.1	3	3.7	-1.62	0.020523	SNORD15B	small nucleolar RNA, C/D box 15B
11759793_x_at	Hs.412818.2	3.37	4.06	-1.62	0.003738	FAM71D	family with sequence similarity 71, member D
11761856_x_at	Hs.719798.1	3.14	3.83	-1.62	0.027784	LINC01001	long intergenic non-protein coding RNA 1001; uncharacterized LOC100132062; uncharacterized LOC100133331; putative uncharacterized protein FLJ46235-like; uncharacterized LOC101060494; uncharacterized LOC101926894; uncharacterized LOC101929038; putative uncharacterized protein encoded by LINC00174-like; uncharacterized LOC101930127; uncharacterized LOC101930567; uncharacterized LOC388572; uncharact…
11763760_a_at	Hs.107125.2	2.2	2.89	-1.62	0.024813	PLVAP	plasmalemma vesicle associated protein
11723410_a_at	Hs.1787.1	2.69	3.4	-1.63	0.04701	PLP1	proteolipid protein 1
11736365_a_at	Hs.232532.1	3.96	4.67	-1.63	0.007288	KIAA0586	KIAA0586
11739527_a_at	Hs.558009.1	3.82	4.52	-1.63	0.037374	SECTM1	secreted and transmembrane 1
11740439_x_at	Hs.631846.1	3.85	4.55	-1.63	0.001522	FUT6	fucosyltransferase 6 (alpha (1,3) fucosyltransferase)
11745210_s_at	Hs.654709.1	8.68	9.38	-1.63	0.008594	PCDH9	protocadherin 9
11747817_x_at	Hs.25584.3	2.48	3.19	-1.63	0.016981	ARFGAP1	ADP-ribosylation factor GTPase activating protein 1
11749060_a_at	Hs.56729.4	4.78	5.48	-1.63	0.002142	LSP1	lymphocyte-specific protein 1
11760194_at	Hs.644625.3	2.21	2.92	-1.63	0.031134	LRRIQ3	leucine-rich repeats and IQ motif containing 3
11761404_at	Hs.631989.2	2.39	3.09	-1.63	0.048387	RING1	ring finger protein 1
11733081_a_at	Hs.513870.2	3.87	4.59	-1.64	0.039783	ATP2A3	ATPase, Ca++ transporting, ubiquitous
11734208_s_at	Hs.715806.1	2.04	2.75	-1.64	0.004651	CNTF	ciliary neurotrophic factor; ZFP91-CNTF readthrough (NMD candidate)
11737189_at	Hs.632229.2	3.39	4.11	-1.64	0.0359	RECQL5	RecQ protein-like 5
11737818_a_at	Hs.345877.1	3.05	3.76	-1.64	0.035025	LOXHD1	lipoxygenase homology domains 1
11742161_a_at	Hs.426551.1	2.39	3.1	-1.64	0.00424	C22orf42	chromosome 22 open reading frame 42
11759460_at	Hs.631584.1	2.09	2.8	-1.64	0.026896	ZNF836	zinc finger protein 836
11760748_at	Hs.436023.3	2.42	3.13	-1.64	0.032692	PRDM1	PR domain containing 1, with ZNF domain
11721369_a_at	Hs.654911.1	3.97	4.69	-1.65	0.047274	TRAPPC9	trafficking protein particle complex 9
11731474_at	Hs.658169.1	2.09	2.81	-1.65	0.040511	SFRP4	secreted frizzled-related protein 4
11732931_at	Hs.248437.2	2.51	3.23	-1.65	0.023011	ERI2	ERI1 exoribonuclease family member 2
11733177_a_at	Hs.205392.1	3.98	4.7	-1.65	0.042188	ZNF507	zinc finger protein 507
11738488_a_at	Hs.452574.1	3.45	4.17	-1.65	0.005772	GPR148	G protein-coupled receptor 148
11751036_a_at	Hs.497148.4	2.71	3.43	-1.65	0.01155	RGL1	ral guanine nucleotide dissociation stimulator-like 1
11762990_x_at	Hs.74647.31	4.56	5.28	-1.65	0.000569	MGC40069	uncharacterized protein MGC40069; T cell receptor alpha constant; T cell receptor alpha joining 17; T cell receptor alpha variable 20; T cell receptor delta variable 2; YME1-like 1 ATPase
11738980_a_at	Hs.631659.1	2.62	3.35	-1.66	0.013797	CD4	CD4 molecule
11759256_at	Hs.655235.1	2.5	3.23	-1.66	0.001832	HIST1H4A	histone cluster 1, H4a; histone cluster 1, H4b; histone cluster 1, H4c; histone cluster 1, H4d; histone cluster 1, H4e; histone cluster 1, H4f; histone cluster 1, H4h; histone cluster 1, H4i; histone cluster 1, H4j; histone cluster 1, H4k; histone cluster 1, H4l; histone cluster 2, H4a; histone cluster 2, H4b; histone cluster 4, H4
11760197_at	Hs.292026.2	2.41	3.13	-1.66	0.035145	EIF4E2	eukaryotic translation initiation factor 4E family member 2
11720993_at	Hs.518438.1	4.88	5.63	-1.67	0.026811	SOX2	SRY (sex determining region Y)-box 2
11729058_s_at	Hs.279522.1	4.08	4.82	-1.67	0.011985	NR4A3	nuclear receptor subfamily 4, group A, member 3
11729338_x_at	Hs.567384.1	1.82	2.57	-1.67	0.000123	PSTPIP2	proline-serine-threonine phosphatase interacting protein 2
11732573_a_at	Hs.113275.1	2.64	3.38	-1.67	0.037312	P2RX6	purinergic receptor P2X, ligand-gated ion channel, 6
11753146_a_at	Hs.660862.4	4.72	5.46	-1.67	0.003618	FAM83A-AS1	FAM83A antisense RNA 1
11722401_at	Hs.441038.1	2.03	2.78	-1.68	0.028356	PAGE4	P antigen family, member 4 (prostate associated)
11724481_a_at	Hs.36053.1	4.38	5.13	-1.68	0.027577	NREP	neuronal regeneration related protein
11732810_at	Hs.288522.1	2.77	3.52	-1.68	0.015169	HHIPL1	HHIP-like 1
11734893_s_at	Hs.445244.1	3.41	4.16	-1.68	0.008942	SOBP	sine oculis binding protein homolog (Drosophila)
11740724_a_at	Hs.512217.1	3.51	4.25	-1.68	0.009077	MOGAT3	monoacylglycerol O-acyltransferase 3
11748187_s_at	Hs.657395.2	2.45	3.2	-1.68	0.012588	LOC101930630	putative stereocilin-like protein-like; stereocilin
11761494_a_at	Hs.147762.3	2.38	3.12	-1.68	0.003447	CCDC108	coiled-coil domain containing 108
11723127_x_at	Hs.106137.1	3.25	4.01	-1.69	0.027078	NOTUM	notum pectinacetylesterase homolog (Drosophila)
11733956_at	Hs.490252.1	3.69	4.44	-1.69	0.02195	SPRR2F	small proline-rich protein 2F
11742172_at	Hs.553677.1	2.48	3.24	-1.69	0.040885	KRTAP13-4	keratin associated protein 13-4
11763794_a_at	Hs.29106.5	2.57	3.33	-1.69	0.044631	DUSP22	dual specificity phosphatase 22; dual specificity protein phosphatase 22-like
11719012_at	Hs.591968.1	3.88	4.65	-1.7	0.020248	FZD4	frizzled class receptor 4
11725442_a_at	Hs.239.1	3.91	4.67	-1.7	0.043358	FOXM1	forkhead box M1
11752282_a_at	Hs.655714.3	3.11	3.87	-1.7	0.034479	PPFIBP2	PTPRF interacting protein, binding protein 2 (liprin beta 2)
11721687_at	Hs.519601.1	4.37	5.15	-1.71	0.002882	ID4	inhibitor of DNA binding 4, dominant negative helix-loop-helix protein
11721971_at	Hs.371977.1	2.87	3.65	-1.72	0.042016	JADE3	jade family PHD finger 3
11750248_x_at	Hs.444024.5	2.15	2.93	-1.72	0.046548	SNX19	sorting nexin 19
11750654_s_at	Hs.567295.4	3.03	3.82	-1.73	0.035782	ITPR1	inositol 1,4,5-trisphosphate receptor, type 1
11730571_at	Hs.104633.1	2.26	3.07	-1.74	0.001798	AGRP	agouti related protein homolog (mouse)
11739518_a_at	Hs.41296.1	5.03	5.82	-1.74	0.030016	FLRT3	fibronectin leucine rich transmembrane protein 3
11740563_at	Hs.462400.1	2.2	3	-1.74	0.013206	EVPLL	envoplakin-like
11729088_at	Hs.491941.1	2.12	2.92	-1.75	0.001377	C8orf34	chromosome 8 open reading frame 34
11754264_a_at	Hs.708128.3	2.46	3.27	-1.75	0.025104	KHSRP	KH-type splicing regulatory protein
11760480_at	Hs.635072.1	3.34	4.15	-1.75	0.01763	CIDECP	cell death-inducing DFFA-like effector c pseudogene
11729081_at	Hs.87619.1	3.34	4.17	-1.77	0.035001	FAM155B	family with sequence similarity 155, member B
11752799_at	Hs.689628.1	2.23	3.06	-1.77	0.018815	LOC100131131	AHPA9419
11716339_a_at	Hs.520819.1	4.49	5.32	-1.78	0.003699	INSIG1	insulin induced gene 1
11731783_a_at	Hs.136979.1	3.53	4.36	-1.78	0.021071	RASAL3	RAS protein activator like 3
11741421_s_at	Hs.448010.1	4.02	4.86	-1.78	0.026184	SLC16A13	solute carrier family 16, member 13
11762212_at	Hs.517972.2	2.92	3.75	-1.78	0.037308	TRAIP	TRAF interacting protein
11735885_a_at	Hs.657413.1	2	2.84	-1.79	0.0001	KCNH7	potassium voltage-gated channel, subfamily H (eag-related), member 7
11738477_a_at	Hs.449179.1	2.92	3.76	-1.79	0.026683	HTR3E	5-hydroxytryptamine (serotonin) receptor 3E, ionotropic
11762456_at	Hs.717315.1	2.25	3.08	-1.79	0.023219
11719641_at	Hs.654899.1	2.97	3.82	-1.8	0.006411	CDS1	CDP-diacylglycerol synthase (phosphatidate cytidylyltransferase) 1
11732264_a_at	Hs.169743.1	3.23	4.07	-1.8	0.033114	OLFM2	olfactomedin 2
11759273_x_at	Hs.553506.1	2.33	3.18	-1.8	0.010921	HIST1H2BI	histone cluster 1, H2bi
11762988_at	Hs.74647.31	4.13	4.98	-1.81	0.001045	hADV38S2	SubName: Full=HADV38S2; Flags: Fragment;; olfactory receptor, family 6, subfamily C, member 4; Homo sapiens mRNA for T cell receptor alpha variable 13, partial cds, clone: SEB 7.; Homo sapiens mRNA for unknown variable region, clone: SEB 74.; RecName: Full=T-cell receptor alpha chain C region;; T cell receptor alpha joining 52; T cell receptor alpha variable 38-2/delta variable 8; YME1-like 1 ATP…
11718315_at	Hs.75317.1	3.12	3.98	-1.82	0.009125	SLC16A2	solute carrier family 16, member 2 (thyroid hormone transporter)
11747579_x_at	Hs.401388.2	4.31	5.19	-1.83	0.006953	SENP2	SUMO1/sentrin/SMT3 specific peptidase 2
11751147_a_at	Hs.718492.4	3.38	4.25	-1.83	8.5e-05	MOCS1	molybdenum cofactor synthesis 1
11739795_a_at	Hs.464157.2	3.33	4.21	-1.84	0.007565	RHBDF2	rhomboid 5 homolog 2 (Drosophila)
11760386_at	Hs.459095.3	2.61	3.49	-1.84	0.003796	IL16	interleukin 16
11731649_x_at	Hs.504352.1	2.61	3.52	-1.88	0.017385	LOC102725271	neurotrimin-like; neurotrimin
11735025_x_at	Hs.700874.1	3.15	4.06	-1.88	0.008878	ZBTB7B	zinc finger and BTB domain containing 7B
11750264_x_at	Hs.688627.2	2.61	3.55	-1.91	0.031932	TMEM19	transmembrane protein 19
11760369_at	Hs.433222.3	2.21	3.14	-1.91	0.02461	NPC2	Niemann-Pick disease, type C2
11730472_a_at	Hs.445711.1	3.04	3.98	-1.92	0.038553	PDE3B	phosphodiesterase 3B, cGMP-inhibited
11763002_s_at	Hs.621281.34	4.8	5.74	-1.93	0.001582	IL23A	interleukin 23, alpha subunit p19; Homo sapiens mRNA for T cell receptor beta variable 9, partial cds, clone: SEB 203.; SubName: Full=V_segment translation product; Flags: Fragment;; T cell receptor beta variable 9
11760876_at	Hs.188528.6	3.4	4.38	-1.97	0.007037	ADD2	adducin 2 (beta)
11721688_at	Hs.519601.1	3.56	4.57	-2.02	0.012324	ID4	inhibitor of DNA binding 4, dominant negative helix-loop-helix protein
11720060_x_at	Hs.268728.1	2.61	3.62	-2.02	0.016162	TTYH1	tweety family member 1
11730667_x_at	Hs.192927.1	2.49	3.53	-2.06	0.003686	PPP1R14D	protein phosphatase 1, regulatory (inhibitor) subunit 14D
11756852_a_at	Hs.151761.6	3.08	4.13	-2.07	0.00537	KIAA0100	KIAA0100
11763600_at	Hs.116244.2	3.44	4.5	-2.08	0.021351	WDR62	WD repeat domain 62
11752533_a_at	Hs.567717.5	2.59	3.64	-2.08	0.038792	DCST1	DC-STAMP domain containing 1
11728000_a_at	Hs.412355.1	3.61	4.68	-2.11	0.029393	CERS1	ceramide synthase 1; growth differentiation factor 1
11730247_a_at	Hs.521075.1	3.27	4.41	-2.19	0.04029	PVRIG	poliovirus receptor related immunoglobulin domain containing; stromal antigen 3
11735295_a_at	Hs.187636.1	3.9	5.04	-2.21	0.017273	LRRK2	leucine-rich repeat kinase 2
